# Supplementary material for: SALM1 controls synapse development by promoting F‐actin/PIP2‐dependent Neurexin clustering
Source: PubMed Central journal article supplement (PMC6717895; doi:10.15252/embj.2018101289), 2019-08-01
Supplement: EMBJ-38-e101289-s002.pdf [file EMBJ-38-e101289-s002.pdf]

## Expanded View Figures

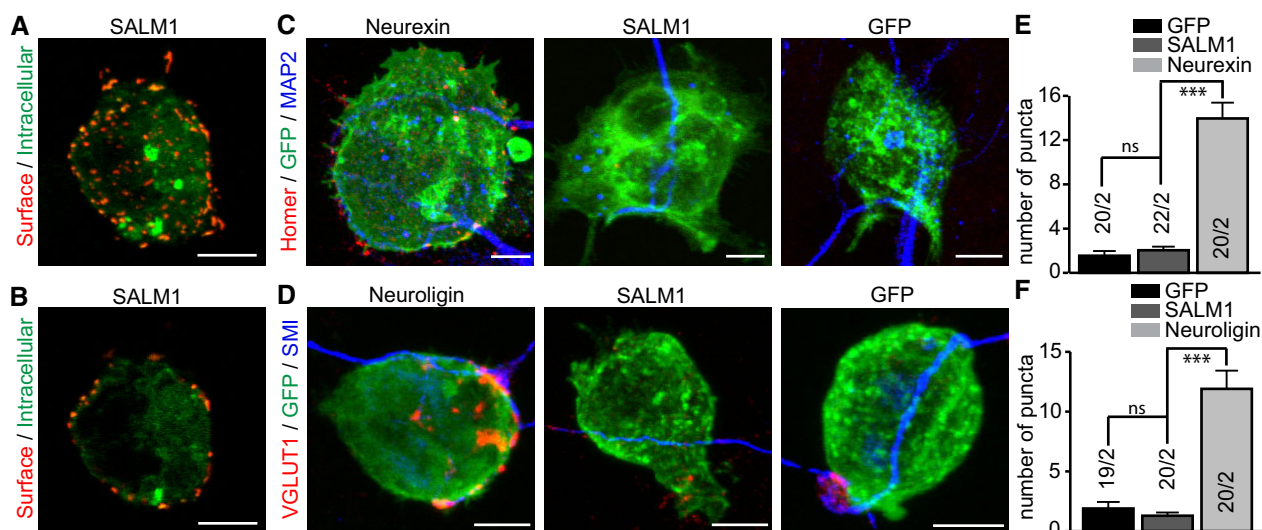

**Figure EV1. SALM1 does not induce synaptogenesis in mixed culture assays.**

- A Collapsed z-stack image of a calcium phosphate transfected HEK cell showing surface expression (red) and intracellular expression (green) of SALM1-pHI.
- B Single z-slice from the z-stack image given in (A).
- C, D Example images of calcium phosphate transfected HEK cells expressing GFP, SALM1-pHI, Nrnx1 $\beta$ -pHI, or HA-Nlg1 (green) co-cultured with DIV9-10 sandwich-cultured mouse hippocampal neurons. Dendrites were stained for MAP2 (blue), postsynapses for Homer (C), and presynapses for VGLuT1 (D) (red).
- E, F Average number of postsynapses  $\pm$  SEM (E) or presynapses  $\pm$  SEM (F) per HEK cell. Numbers in bars indicate total number of cells/total number of independent cultures. Kruskal–Wallis tests with post hoc pairwise comparisons were used for (E) ( $P < 0.001$ ) and (F) ( $P < 0.001$ ). ns = not significant and \*\*\* $P < 0.001$ .

Data information: Scale bars (A–D) = 5  $\mu$ m.

Source data are available online for this figure.

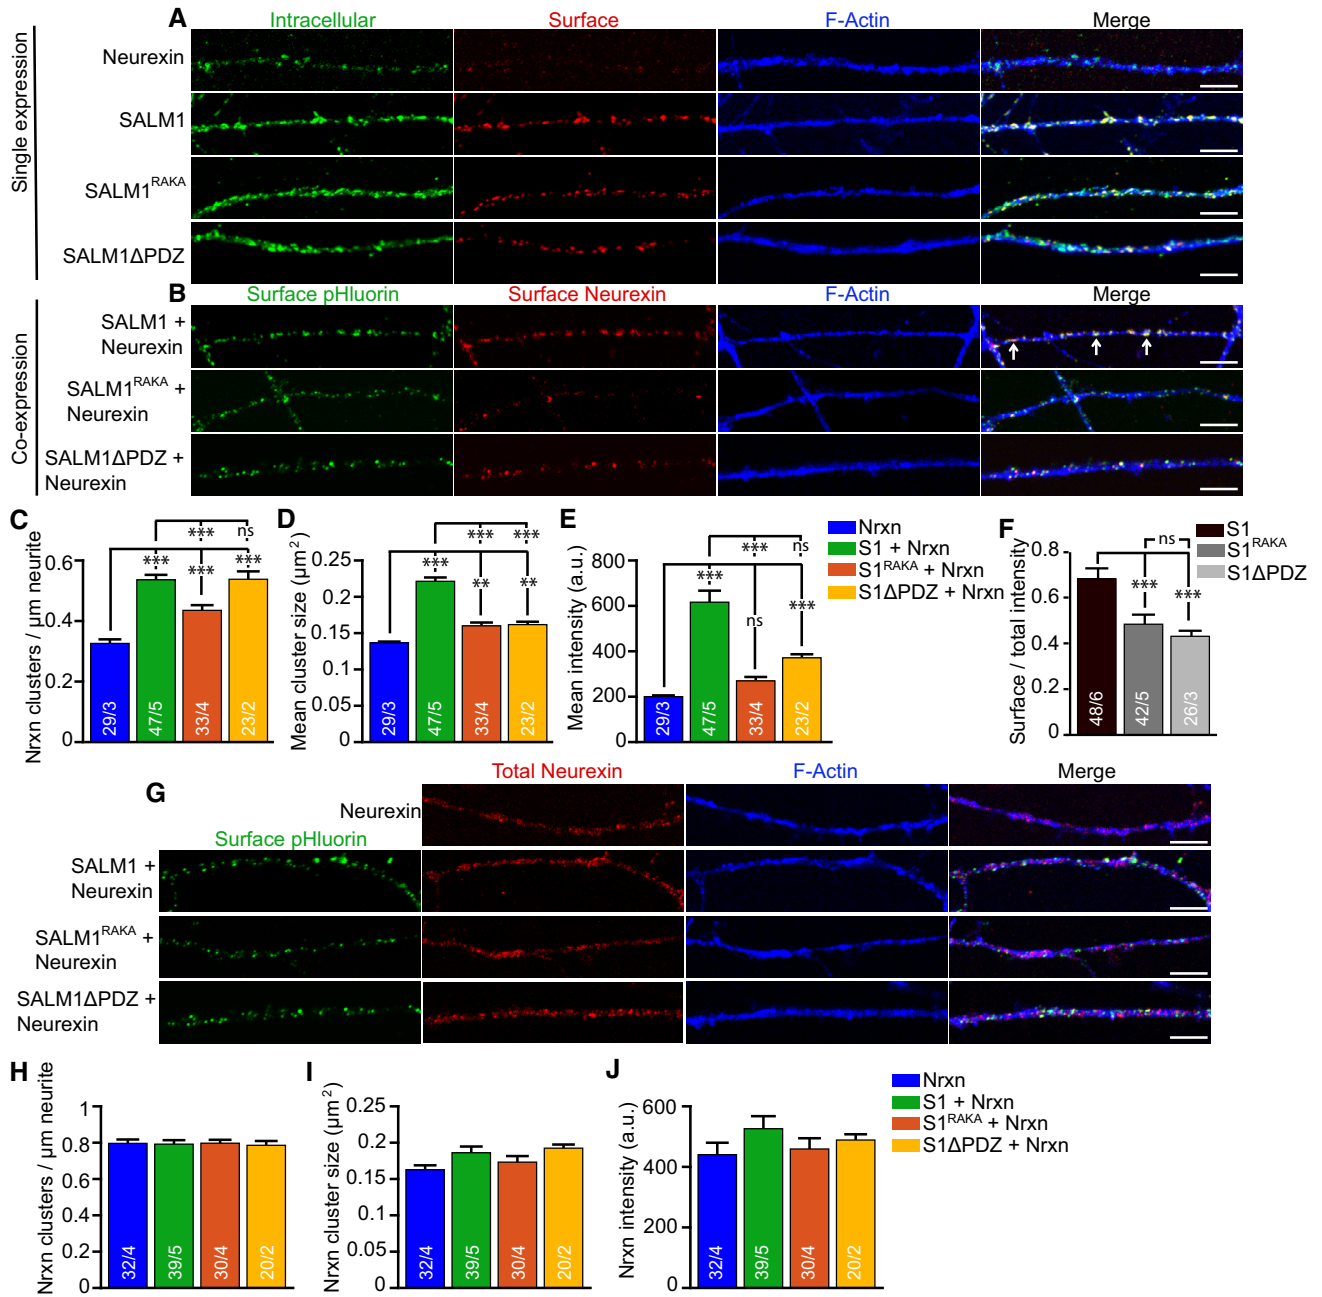

Figure EV2.

**Figure EV2. SALM1 mediates Nrnx1 $\beta$  expression on the surface of hippocampal neurons.**

- A Example images of neurites from DIV 11 sandwich-cultured mouse excitatory hippocampal neurons lentivirally infected at DIV4 with Nrnx1 $\beta$ -FLAG, SALM1-pHI, or SALM1<sup>RAKA</sup>-pHI. Intracellular and surface stainings are shown for each construct. Bars = 5  $\mu$ m.
- B Example images of neurites from DIV 11 sandwich-cultured mouse excitatory hippocampal neurons lentivirally co-infected at DIV4 with Nrnx1 $\beta$ -FLAG and SALM1-pHI or Nrnx1 $\beta$ -FLAG and SALM1<sup>RAKA</sup>-pHI. Surface stainings are shown for each construct. Arrows indicate examples of overlap between SALM1-pHI and Nrnx1 $\beta$ -FLAG clusters. Bars = 5  $\mu$ m.
- C–E Average number (C), size (D), and intensity (E)  $\pm$  SEM of surface Nrnx1 $\beta$ -FLAG clusters.
- F Average ratio  $\pm$  SEM of surface over total staining intensity for SALM1-pHI and SALM1<sup>RAKA</sup>-pHI.
- G Example images of neurites from DIV 11 sandwich-cultured mouse excitatory hippocampal neurons lentivirally co-infected at DIV4 with Nrnx1 $\beta$ -FLAG and SALM1-pHI or Nrnx1 $\beta$ -FLAG and SALM1<sup>RAKA</sup>-pHI. Surface stainings are shown for SALM1-pHI and SALM1<sup>RAKA</sup>-pHI. Total staining is shown for Nrnx1 $\beta$ -FLAG. Bars = 5  $\mu$ m.
- H–J Average number (H), size (I), and intensity (J)  $\pm$  SEM of total (intracellular and surface) Nrnx1 $\beta$ -FLAG clusters.

Data information: For all graphs, the  $n$  is indicated in the bars and represents the total number of cells/total number of independent cultures. A one-way ANOVA test with post hoc Bonferroni test was used for (C) ( $P < 0.001$ ), (F) ( $P < 0.001$ ), and (H) ( $P = 0.987$ ). Kruskal–Wallis tests with post hoc paired comparisons were used for (D) ( $P < 0.001$ ), (E) ( $P < 0.001$ ), (I) ( $P = 0.06$ ), and (J) ( $P = 0.192$ ). ns = not significant, \*\* $P < 0.01$ , and \*\*\* $P < 0.001$ .

Source data are available online for this figure.

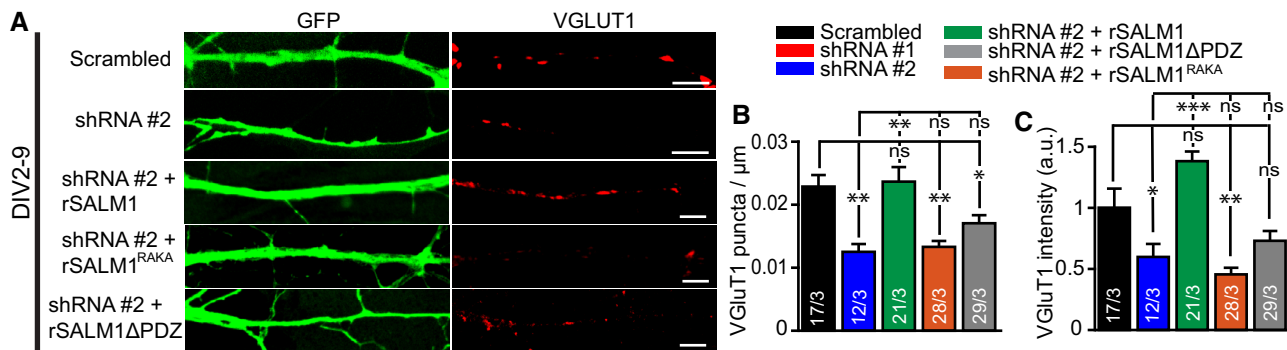**Figure EV3. Knockdown of SALM1 decreases synapse formation and synaptic vesicle clustering during early development.**

- A Example images of neurites from single isolated (autaptic) mouse excitatory hippocampal neurons stained for GFP and VGLUT1. Cells were lentivirally infected with scrambled, shRNA#2, shRNA#2 + rSALM1, shRNA#2 + rSALM1<sup>RAKA</sup> or with shRNA#2 + rSALM1 $\Delta$ PDZ at DIV2 and analyzed 7 days later (DIV9). Bars = 5  $\mu$ m.
- B Average number of VGLUT1 puncta per  $\mu$ m neurite  $\pm$  SEM per neuron (Kruskal–Wallis,  $P < 0.001$ ).
- C Average intensity  $\pm$  SEM of VGLUT1 puncta per neuron (Kruskal–Wallis,  $P < 0.001$ ).

Data information: For all graphs, numbers in bars indicate total number of neurons/total number of independent cultures. ns = not significant, \* $P < 0.05$ , \*\* $P < 0.01$ , and \*\*\* $P < 0.001$ .

Source data are available online for this figure.
